# Supplementary material for: The Influence of Time of Day of Vaccination with BNT162b2 on the Adverse Drug Reactions and Efficacy of Humoral Response against SARS-CoV-2 in an Observational Study of Young Adults
Source: MDPI journal article supplement (doi:10.3390/vaccines10030443), 2022-03-14
Supplement: s1 [file s1]

## Supplementary tables

**Table S1.** Comparison of anti-S antibody levels between studied groups.

|                               | Group 1      | Group 2      | Group 3      | Group 4      | Group 5      | p     |
|-------------------------------|--------------|--------------|--------------|--------------|--------------|-------|
| All                           | 102.48±58.32 | 117.54±71.06 | 99.98±59.41  | 98.33±59.41  | 117.86±62.58 | 0.808 |
| All excl. anti-N positive     | 95.24±53.93  | 118.93±72.02 | 90.34±49.24  | 96.50±60.30  | 80.54±15.17  | 0.555 |
| Females                       | 100.39±57.26 | 122.96±77.23 | 98.26±54.53  | 94.35±53.18  | 119.45±66.26 | 0.759 |
| Females excl. anti-N positive | 93.83±52.81  | 127.20±77.17 | 90.29±47.08  | 91.36±53.73  | 80.54±15.17  | 0.438 |
| Males                         | 110.06±62.38 | 102.81±52.88 | 104.28±70.62 | 114.88±79.73 | 109.60±42.78 | 0.976 |
| Males excl. anti-N positive   | 100.61±58.76 | 89.18±42.52  | 90.49±55.98  | 114.88±79.73 | -            | 0.873 |

Data are presented as means±SD, groups are compared with ANOVA. Antibody units are presented as BAU/ml × 1000.

**Table S2.** Comparison of anti-S level between reported lifestyle groups.

|                               | Early birds | Owls         | No preferences | p     |
|-------------------------------|-------------|--------------|----------------|-------|
| All                           | 96.98±54.80 | 108.96±64.44 | 103.32±60.55   | 0.194 |
| All excl. anti-N positive     | 89.42±49.44 | 99.90±54.22  | 95.58±62.03    | 0.293 |
| Females                       | 98.14±53.90 | 104.92±61.75 | 102.41±59.42   | 0.650 |
| Females excl. anti-N positive | 91.94±48.42 | 97.19±53.60  | 93.14±59.10    | 0.771 |
| Males                         | 92.18±58.99 | 118.29±70.05 | 106.68±65.79   | 0.219 |
| Males excl. anti-N positive   | 78.08±53.40 | 106.59±55.89 | 106.16±74.79   | 0.157 |

Data presented as means±SD, groups are compared with ANOVA.

**Table S3.** Correlation of anti-S level with the time between anti-S level measurement and administration of the 2<sup>nd</sup> dose.

|                 | All   |       | Females     |              | Males |       |
|-----------------|-------|-------|-------------|--------------|-------|-------|
|                 | rho   | p     | rho         | p            | rho   | p     |
| All             | -0.04 | 0.397 | -0.03       | 0.645        | -0.08 | 0.392 |
| Group 1         | 0.08  | 0.311 | 0.02        | 0.824        | 0.24  | 0.177 |
| Group 2         | -0.38 | 0.056 | -0.34       | 0.150        | -0.56 | 0.192 |
| Group 3         | -0.06 | 0.474 | -0.02       | 0.792        | -0.10 | 0.483 |
| Group 4         | -0.07 | 0.565 | 0.00        | 0.994        | -0.12 | 0.712 |
| Group 5         | -0.14 | 0.455 | 0.00        | 0.993        | -0.87 | 0.054 |
| Anti-N positive | 0.16  | 0.120 | <b>0.25</b> | <b>0.049</b> | -0.04 | 0.856 |
| Anti-N negative | -0.08 | 0.124 | -0.08       | 0.192        | -0.10 | 0.368 |

rho - Spearman correlation coefficient.
